# Supplementary material for: In Silico Design and Validation of OvMANE1, a Chimeric Antigen for Human Onchocerciasis Diagnosis
Source: Pathogens. 2020 Jun 22;9(6):495. doi: 10.3390/pathogens9060495 (PMC7350323; doi:10.3390/pathogens9060495)
Supplement: Supplementary file 1 [file pathogens-09-00495-s001.pdf]

**Supplementary Materials:** The following are available online at [www.mdpi.com/xxx/s1](http://www.mdpi.com/xxx/s1), Table S1: Selected peptide sequences and their corresponding sensitivity and specificity.

**Table S1:** Selected peptide sequences and their corresponding sensitivity and specificity.

| Protein ID       | Sequence        | Sensitivity (%) | Specificity (%) |
|------------------|-----------------|-----------------|-----------------|
| OVOC5897 (IDP 1) | RTFGYDPQVTQEEAA | 95.5            | 96.3            |
| OVOC4989 (IDP 2) | NMQGESKPLETQEMI | 95.2            | 94.3            |
| OVOC5528 (IDP 3) | QLRNIEPIVTQEKWT | 95.2            | 95.3            |
| OVOC9141 (IDP 4) | VKNGVPQVTQEHIEE | 95.2            | 92.7            |
| OVOC7266 (IDP 5) | PPFADGDDKRIT    | 80.0            | 97.4            |
| OVOC1743 (IDP 6) | AADGDDKNMF      | 80.0            | 100             |
| OVOC1920 (IDP 7) | LVPMMDGNDKQPAI  | 86.7            | 92.2            |
| OVOC3954 (IDP 8) | LEADGVDGRDKLIKE | 80.0            | 98.4            |

The sensitivity and specificity of the selected peptides were obtained from data previously reported by Lagatie et al. [1].
